# Supplementary material for: Short- and long-term effects of continuous compost amendment on soil microbiome community
Source: PubMed Central journal article supplement — Comput Struct Biotechnol J. 2023 May 31;21:3280–92. doi: 10.1016/j.csbj.2023.05.030 (PMC10781717; doi:10.1016/j.csbj.2023.05.030), 2023-05-31
Supplement: mmc1.pdf [file mmc1.pdf]

# Supplementary Figures and Tables

Cohen et al 2023

Fig. S1

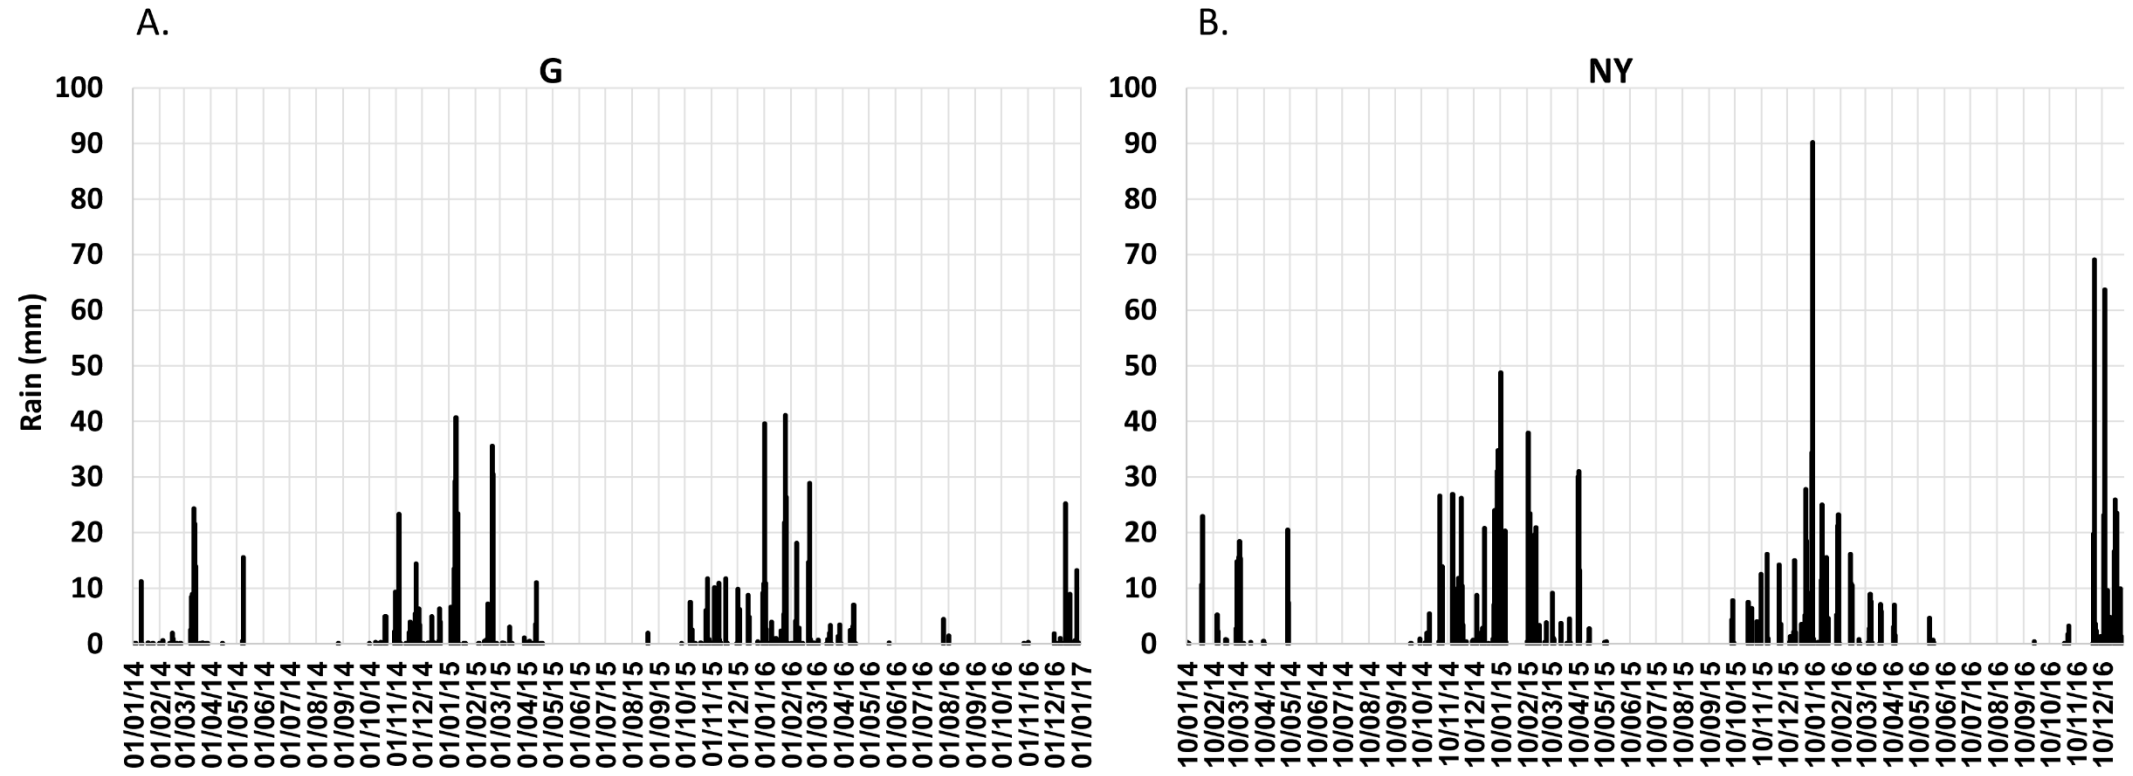

Fig. S2

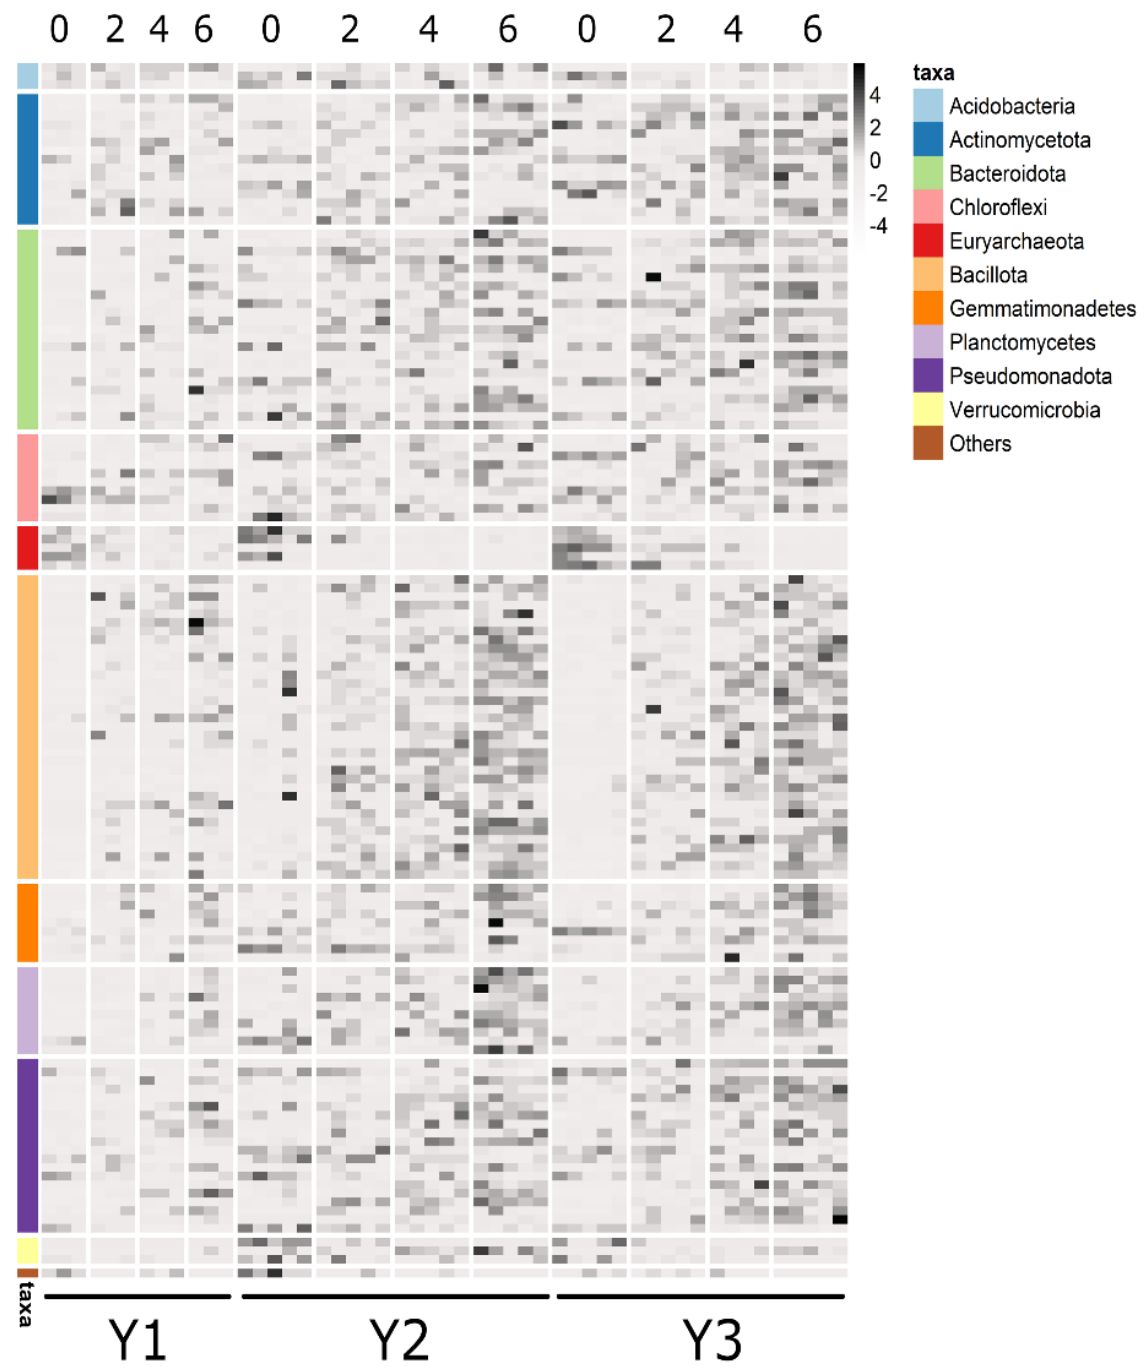

Fig. S3

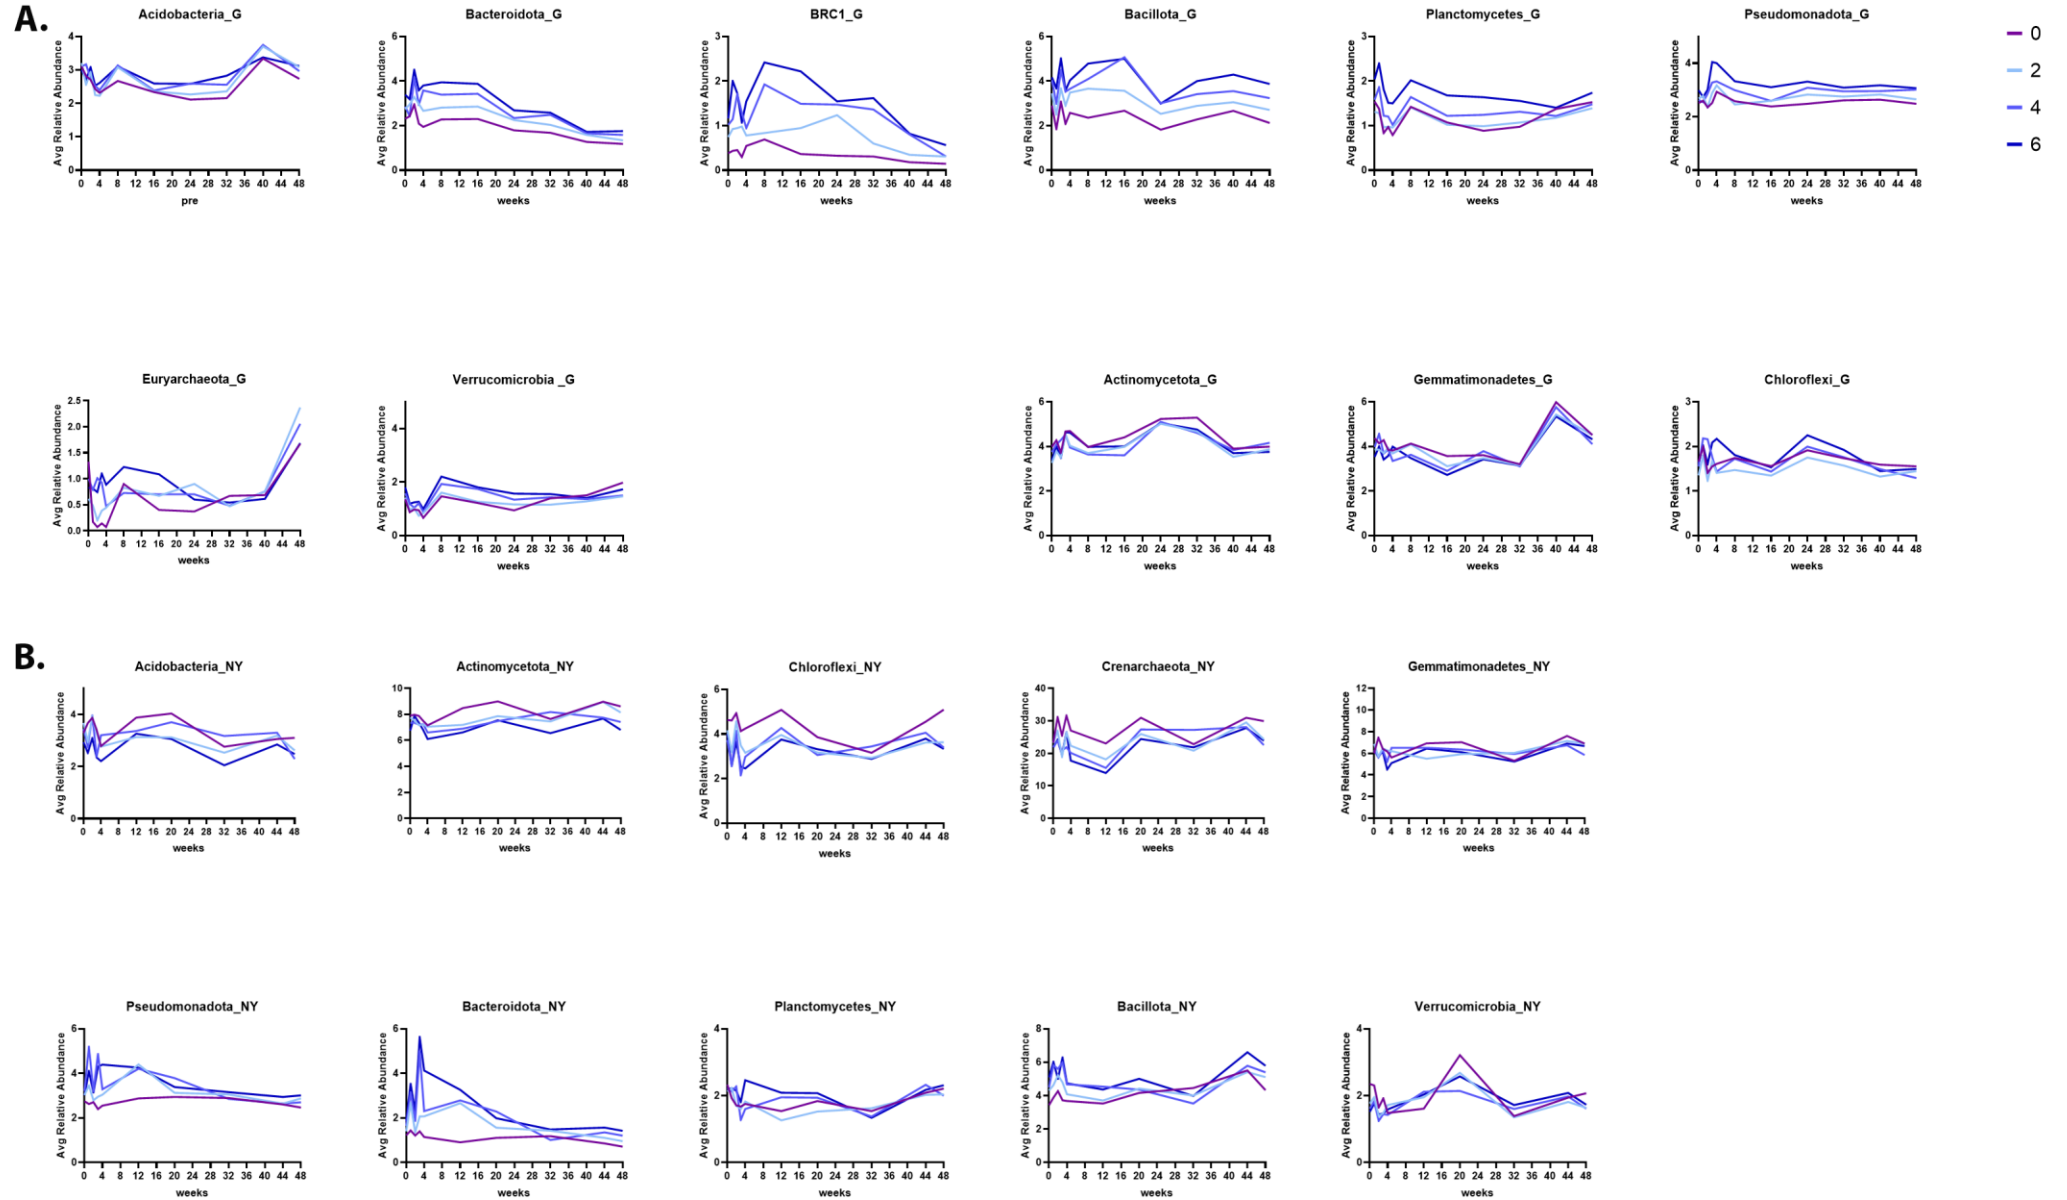

Fig. S4

A.

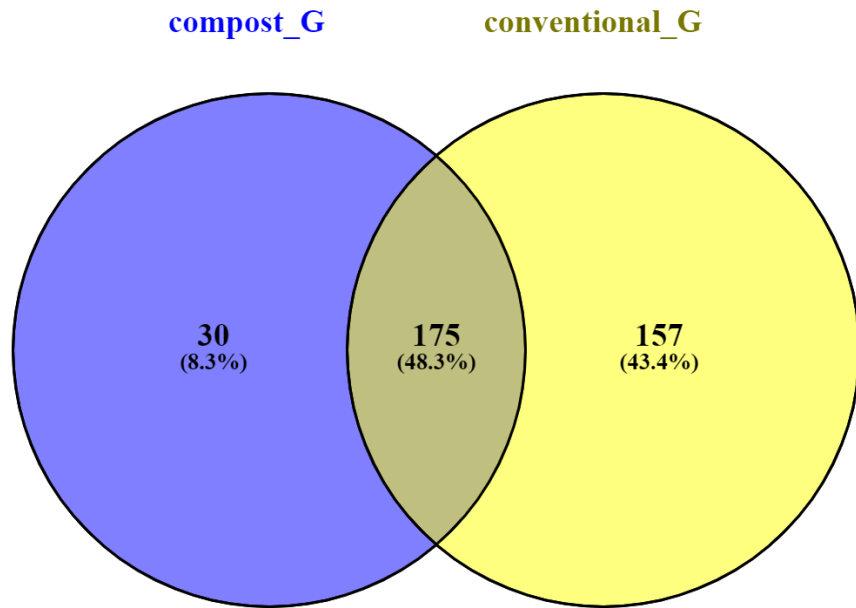

B.

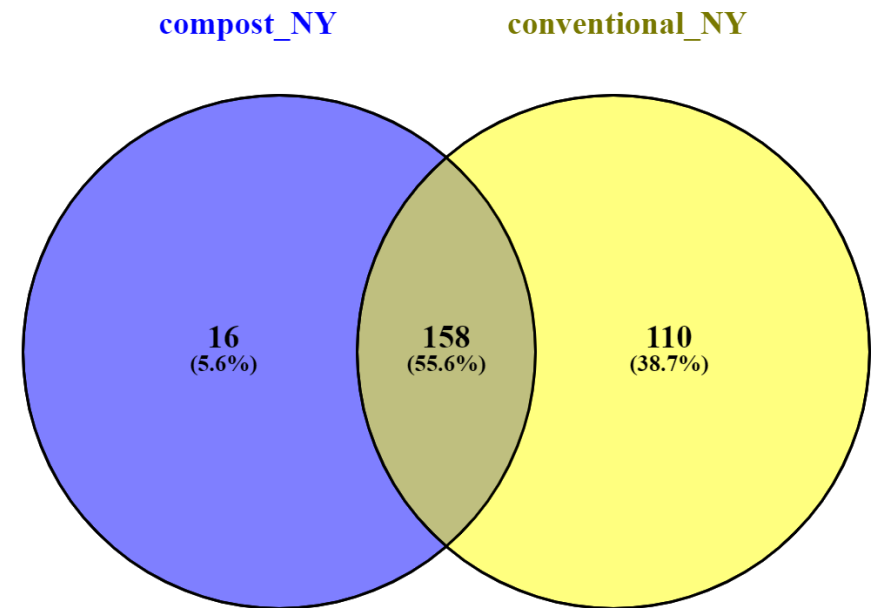

Table S1- Chemical and physical characteristics of compost applied during the study

| Variable                                                       | Units               | G     |                |                 | NY    |       |
|----------------------------------------------------------------|---------------------|-------|----------------|-----------------|-------|-------|
|                                                                |                     | 2013  | 2015 (January) | 2015 (December) | 2014  | 2015  |
| Organic C                                                      | % w/w               | 16.6  | 31.7           | 14.4            | 25.9  | 30.1  |
| Total N                                                        | % w/w               | 1.3   | 2.0            | 1.0             | 1.7   | 2.0   |
| C/N                                                            |                     | 12.6  | 16.0           | 14.2            | 12.9  | 15.6  |
| EC                                                             | dS m <sup>-1</sup>  | 8.3   | 8.9            | 5.1             | 9.7   | 8.1   |
| N-NO <sub>3</sub> <sup>-</sup>                                 | mg kg <sup>-1</sup> | 319.0 | 18.0           | 634.0           | 34.0  | 94.0  |
| N-NH <sub>4</sub> <sup>+</sup>                                 | mg kg <sup>-1</sup> | 41.0  | 1261.5         | 165.5           | 168.0 | 218.0 |
| P                                                              | g kg <sup>-1</sup>  | 0.3   | 2.8            | 0.4             | 0.7   | 0.3   |
| K                                                              | g kg <sup>-1</sup>  | 11.8  | 7.9            | 8.5             | 17.6  | 15.5  |
| N-NO <sub>3</sub> <sup>-</sup> /N-NH <sub>4</sub> <sup>+</sup> |                     | 7.8   | 0.0            | 3.8             | 0.2   | 0.4   |
| Bulk density                                                   | kg/m <sup>3</sup>   | 667.0 | 338.0          | 636.0           | 488.0 | 383.0 |
| Ash                                                            | % w/w               | 71.0  | 45.0           | 75.0            | 54.0  | 48.0  |
| pH                                                             |                     | 8.8   | 6.7            | NT              | 7.2   | NT    |

NT=not tested

The chemical tests for all composts were done at the "Newe Ya'ar field service laboratory" according to standard methods

Table S2. The effects of compost load on Gilat and Neve Ya'ar soil properties during 2014-2016.

| Variable     | TOC                | TN      | NH4                 | NO3     | P       | K        | Na       | Cl    | EC                 | pH   |
|--------------|--------------------|---------|---------------------|---------|---------|----------|----------|-------|--------------------|------|
|              | mg g <sup>-1</sup> |         | mg kg <sup>-1</sup> |         |         |          |          |       | dS m <sup>-1</sup> |      |
|              | <b>Gilat</b>       |         |                     |         |         |          |          |       |                    |      |
| Compost Dose |                    |         |                     |         |         |          |          |       |                    |      |
| 0            | 7.19 c             | 0.719 d | 9.08                | 11.0 b  | 11.1 d  | 61.3 c   | 60.7 c   | 48.1  | 0.175 b            | 7.28 |
| 2            | 9.50 b             | 0.975 c | 8.83                | 11.9 b  | 54.9 c  | 126.0 b  | 88.7 b   | 60    | 0.187 b            | 7.37 |
| 4            | 10.23 b            | 1.087 b | 9.2                 | 18.7 ab | 90.2 b  | 163.7 ab | 112.0 ab | 56.6  | 0.224 ab           | 7.24 |
| 6            | 12.26 a            | 1.297 a | 9.68                | 22.5 a  | 123.9 a | 190.9 a  | 132.0 a  | 66.7  | 0.251 a            | 7.32 |
|              | <b>Neve Ya'ar</b>  |         |                     |         |         |          |          |       |                    |      |
| Compost Dose |                    |         |                     |         |         |          |          |       |                    |      |
| 0            | 18.39              | 1.69 b  | 13.49               | 18.3    | 15.2 a  | 28.2 b   |          | 170.2 | 0.237              | 7.21 |
| 2            | 19.51              | 1.85 ab | 14.3                | 20.2    | 41.0 b  | 48.0 a   |          | 172.2 | 0.265              | 7.11 |
| 4            | 20.99              | 1.98 ab | 14.48               | 19.7    | 46.8 b  | 54.4 a   |          | 146.4 | 0.269              | 7.2  |
| 6            | 20.27*             | 2.02* a | 14.31               | 23.1    | 67.8 c  | 46.9 a   |          | 139.4 | 0.256              | 7.19 |

\*Average data from years 2014-2015

Table S3 -ANOSIM analysis to dissimilarity distance treatment/year pairs in Gilat and NY 2014-2016

|   | Site | Treatment1 | Treatment2 | p-value | q-value |
|---|------|------------|------------|---------|---------|
| A | G    | Y1         | Y2         | 0.001   | 0.001   |
|   |      | Y1         | Y3         | 0.001   | 0.001   |
|   |      | Y2         | Y3         | 0.001   | 0.001   |
| B | NY   | Y1         | Y2         | 0.001   | 0.001   |
|   |      | Y1         | Y3         | 0.001   | 0.001   |
|   |      | Y2         | Y3         | 0.001   | 0.001   |

|   | Site | Treatment1 | Treatment2 | p-value | q-value |
|---|------|------------|------------|---------|---------|
| C | G    | 0          | 2          | 0.131   | 0.1965  |
|   |      | 0          | 4          | 0.013   | 0.039   |
|   |      | 0          | 6          | 0.001   | 0.006   |
|   |      | 2          | 4          | 0.536   | 0.6432  |
|   |      | 2          | 6          | 0.051   | 0.102   |
|   |      | 4          | 6          | 0.649   | 0.649   |
| D | NY   | 0          | 2          | 0.525   | 0.7875  |
|   |      | 0          | 4          | 0.123   | 0.369   |
|   |      | 0          | 6          | 0.105   | 0.369   |
|   |      | 2          | 4          | 0.837   | 0.972   |
|   |      | 2          | 6          | 0.36    | 0.72    |
|   |      | 4          | 6          | 0.972   | 0.972   |

Kruskal Wallis analysis to dissimilarity distance treatment pairs per year in Gilat and NY 2014-2016

| E | G-Year | Treatment1 | Treatment2 | p-Value |
|---|--------|------------|------------|---------|
|   | Y1     | 6          | 2          | 0.017   |
|   | Y1     | 4          | 2          | 0.064   |
|   | Y1     | 6          | 4          | 0.289   |
|   | Y2     | 6          | 2          | 0.0001  |
|   | Y2     | 6          | 4          | 0.0008  |
|   | Y2     | 4          | 2          | 0.2687  |
|   | Y3     | 6          | 2          | 0.0001  |
|   | Y3     | 6          | 4          | 0.0001  |
|   | Y3     | 4          | 2          | 0.0001  |

| F | NY-Year | Treatment1 | Treatment2 | p-Value |
|---|---------|------------|------------|---------|
|   | Y1      | 6          | 2          | 0.331   |
|   | Y1      | 4          | 2          | 0.377   |
|   | Y1      | 6          | 4          | 0.724   |
|   | Y2      | 6          | 2          | 0.125   |
|   | Y2      | 4          | 2          | 0.213   |
|   | Y2      | 6          | 4          | 0.868   |
|   | Y3      | 6          | 2          | 0.012   |
|   | Y3      | 6          | 4          | 0.016   |



Table S4 Permanova analysis to NMDS for treatment pairs Gilat and NY 2014-2016

| treatment comparison | test statistic | p-value | treatments |
|----------------------|----------------|---------|------------|
| G_Y1_0_2             | 1.157          | 0.295   | 0-2        |
| G_Y1_0_4             | 1.407          | 0.203   | 0-4        |
| G_Y1_0_6             | 1.843          | 0.106   | 0-6        |
| G_Y1_2_4             | 0.906          | 0.594   | 2-4        |
| G_Y1_2_6             | 1.091          | 0.183   | 2-6        |
| G_Y1_4-6             | 0.986          | 0.596   | 4-6        |
| G_Y2_0_2             | 1.293          | 0.106   | 0-2        |
| G_Y2_0_4             | 1.783          | 0.029   | 0-4        |
| G_Y2_0_6             | 2.924          | 0.008   | 0-6        |
| G_Y2_2_4             | 1.123          | 0.211   | 2-4        |
| G_Y2_2_6             | 1.650          | 0.008   | 2-6        |
| G_Y2_4_6             | 1.210          | 0.097   | 4-6        |
| G_Y3_0_2             | 1.714          | 0.009   | 0-2        |
| G_Y3_0_4             | 2.433          | 0.008   | 0-4        |
| G_Y3_0_6             | 3.483          | 0.01    | 0-6        |
| G_Y3_2_4             | 1.136          | 0.145   | 2-4        |
| G_Y3_2_6             | 1.924          | 0.009   | 2-6        |
| G_Y3_4_6             | 0.968          | 0.521   | 4-6        |
| treatment comparison | test statistic | p-value | treatments |
| NY_Y1_0_2            | 1.091          | 0.183   | 0-2        |
| NY_Y1_0_4            | 1.027          | 0.373   | 0-4        |
| NY_Y1_0_6            | 1.090          | 0.293   | 0-6        |
| NY_Y1_2_4            | 1.091          | 0.183   | 2-4        |
| NY_Y1_2_6            | 0.845          | 0.902   | 2-6        |
| NY_Y1_4_6            | 0.935          | 0.495   | 4-6        |
| NY_Y2_0_2            | 0.856          | 0.478   | 0-2        |
| NY_Y2_0_4            | 1.195          | 0.173   | 0-4        |
| NY_Y2_0_6            | 1.414          | 0.145   | 0-6        |
| NY_Y2_2_4            | 0.821          | 0.579   | 2-4        |
| NY_Y2_2_6            | 1.057          | 0.25    | 2-6        |
| NY_Y2_4_6            | 0.890          | 0.437   | 4-6        |
| NY_Y3_0_2            | 0.811          | 0.867   | 0-2        |
| NY_Y3_0_4            | 1.369          | 0.075   | 0-4        |
| NY_Y3_0_6            | 1.396          | 0.083   | 0-6        |
| NY_Y3_2_4            | 1.106          | 0.153   | 2-4        |
| NY_Y3_2_6            | 0.975          | 0.49    | 2-6        |
| NY_Y3_4_6            | 0.791          | 0.913   | 4-6        |

Table S5-Order level relative abundance comparison between treatments of different compost amendment doses and conventional practice

| Order                                                   | G_Y1_0 | G_Y1_2 | G_Y1_4 | G_Y1_6 | G_Y2_0 | G_Y2_2 | G_Y2_4 | G_Y2_6 | G_Y3_0 | G_Y3_2 | G_Y3_4 | G_Y3_6 |
|---------------------------------------------------------|--------|--------|--------|--------|--------|--------|--------|--------|--------|--------|--------|--------|
| Bacillales                                              | 0.131  | 0.152  | 0.145  | 0.158  | 0.122  | 0.131  | 0.143  | 0.140  | 0.102  | 0.110  | 0.113  | 0.129  |
| Rhizobiales                                             | 0.099  | 0.093  | 0.102  | 0.103  | 0.063  | 0.066  | 0.062  | 0.067  | 0.082  | 0.081  | 0.078  | 0.075  |
| Micrococcales                                           | 0.084  | 0.080  | 0.100  | 0.082  | 0.050  | 0.044  | 0.048  | 0.046  | 0.073  | 0.062  | 0.065  | 0.062  |
| Cytophagales                                            | 0.022  | 0.029  | 0.034  | 0.034  | 0.052  | 0.063  | 0.061  | 0.070  | 0.037  | 0.041  | 0.047  | 0.047  |
| Sphingobacteriales                                      | 0.019  | 0.027  | 0.029  | 0.024  | 0.056  | 0.062  | 0.056  | 0.059  | 0.042  | 0.046  | 0.047  | 0.044  |
| Gemmatimonadales                                        | 0.047  | 0.042  | 0.037  | 0.040  | 0.037  | 0.033  | 0.032  | 0.028  | 0.034  | 0.031  | 0.029  | 0.028  |
| Burkholderiales                                         | 0.040  | 0.039  | 0.065  | 0.036  | 0.024  | 0.027  | 0.026  | 0.035  | 0.032  | 0.028  | 0.030  | 0.026  |
| Rhodospirillales                                        | 0.032  | 0.029  | 0.027  | 0.032  | 0.030  | 0.029  | 0.030  | 0.028  | 0.038  | 0.039  | 0.036  | 0.035  |
| Xanthomonadales                                         | 0.025  | 0.027  | 0.026  | 0.026  | 0.032  | 0.039  | 0.035  | 0.032  | 0.029  | 0.030  | 0.032  | 0.030  |
| Soil Crenarchaeotic Group(SCG)                          | 0.042  | 0.040  | 0.031  | 0.032  | 0.036  | 0.035  | 0.031  | 0.028  | 0.023  | 0.028  | 0.023  | 0.020  |
| Solirubrobacterales                                     | 0.036  | 0.029  | 0.027  | 0.032  | 0.024  | 0.019  | 0.021  | 0.019  | 0.035  | 0.030  | 0.032  | 0.033  |
| Myxococcales                                            | 0.024  | 0.024  | 0.027  | 0.029  | 0.023  | 0.023  | 0.023  | 0.021  | 0.029  | 0.033  | 0.034  | 0.035  |
| Sphingomonadales                                        | 0.025  | 0.027  | 0.028  | 0.024  | 0.022  | 0.026  | 0.022  | 0.022  | 0.028  | 0.025  | 0.026  | 0.028  |
| Rubrobacterales                                         | 0.029  | 0.021  | 0.019  | 0.017  | 0.026  | 0.022  | 0.023  | 0.019  | 0.025  | 0.024  | 0.021  | 0.019  |
| Planctomycetales                                        | 0.016  | 0.018  | 0.016  | 0.022  | 0.024  | 0.023  | 0.024  | 0.026  | 0.021  | 0.022  | 0.024  | 0.023  |
| Soil Crenarchaeotic Group(SCG);uncultured crenarchaeote | 0.024  | 0.023  | 0.017  | 0.019  | 0.023  | 0.021  | 0.021  | 0.023  | 0.016  | 0.019  | 0.018  | 0.019  |
| others                                                  | 0.304  | 0.298  | 0.271  | 0.290  | 0.357  | 0.340  | 0.342  | 0.337  | 0.353  | 0.350  | 0.345  | 0.347  |

Table S6- Permanova analysis for bray-curtis distances based PCoA 2016

G

| Group 1 | Group 2 | Sample size | pseudo-F | p-value | q-value |
|---------|---------|-------------|----------|---------|---------|
| 2       | 4       | 109         | 1.84     | 0.006   | 0.006   |
| 2       | 6       | 110         | 5.35     | 0.001   | 0.0012  |
| 2       | 0       | 109         | 4.46     | 0.001   | 0.0012  |
| 4       | 6       | 109         | 2.35     | 0.001   | 0.0012  |
| 4       | 0       | 108         | 7.61     | 0.001   | 0.0012  |
| 6       | 0       | 109         | 13.48    | 0.001   | 0.0012  |

NY

| Group 1 | Group 2 | Sample size | pseudo-F | p-value | q-value |
|---------|---------|-------------|----------|---------|---------|
| 2       | 4       | 100         | 1.25     | 0.06    | 0.072   |
| 2       | 6       | 100         | 2.34     | 0.001   | 0.0015  |
| 2       | 0       | 98          | 2.44     | 0.001   | 0.0015  |
| 4       | 6       | 100         | 1.21     | 0.099   | 0.099   |
| 4       | 0       | 98          | 3.88     | 0.001   | 0.0015  |
| 6       | 0       | 98          | 6.17     | 0.001   | 0.0015  |

Table S7- Core features analysis

| Compost related core features in G |           |                                          |
|------------------------------------|-----------|------------------------------------------|
| Plot                               | OUT no.   | Closest annotation                       |
| G                                  | seq000071 | <i>Bacillaceae</i>                       |
| G                                  | seq000087 | <i>Sinobacteraceae</i>                   |
| G                                  | seq000116 | <i>Pontibacter</i>                       |
| G                                  | seq000119 | <i>Steroidobacter</i>                    |
| G                                  | seq000122 | <i>Myxococcales</i>                      |
| G                                  | seq000128 | <i>Streptomyces</i>                      |
| G                                  | seq000141 | <i>Paenibacillus amylolyticus</i>        |
| G                                  | seq000158 | <i>Thermoactinomycetaceae</i>            |
| G                                  | seq000169 | <i>Steroidobacter</i>                    |
| G                                  | seq000189 | <i>Ellin517</i>                          |
| G                                  | seq000191 | <i>Planococcus</i>                       |
| G                                  | seq000236 | <i>Bacillaceae</i>                       |
| G                                  | seq000238 | <i>Bacillus</i>                          |
| G                                  | seq000257 | <i>Bacillus</i>                          |
| G                                  | seq000297 | <i>Bacillus firmus</i>                   |
| G                                  | seq000299 | <i>Planctomyces</i>                      |
| G                                  | seq000345 | <i>Virgibacillus</i>                     |
| G                                  | seq000368 | <i>Pontibacter</i>                       |
| G                                  | seq000391 | <i>Chthoniobacteraceae</i>               |
| G                                  | seq000430 | <i>Blastococcus aggregatus</i>           |
| G                                  | seq000439 | <i>Pontibacter</i>                       |
| G                                  | seq000451 | <i>Ellin6075</i>                         |
| G                                  | seq000499 | <i>Ellin6075</i>                         |
| G                                  | seq000555 | <i>Sphingobacteriales</i>                |
| G                                  | seq000601 | <i>Geodermatophilus</i>                  |
| G                                  | seq000659 | <i>Piscirickettsiaceae</i>               |
| G                                  | seq000729 | <i>Candidatus Nitrososphaera SCA1145</i> |
| G                                  | seq000744 | <i>Azohydromonas</i>                     |
| G                                  | seq000748 | <i>Devosia</i>                           |
| G                                  | seq000767 | <i>Kouleothrixaceae</i>                  |

| Compost related core features in NY |           |                                     |
|-------------------------------------|-----------|-------------------------------------|
| NY                                  | seq000049 | <i>Sinorhizobium</i>                |
| NY                                  | seq000100 | <i>Pontibacter</i>                  |
| NY                                  | seq000196 | <i>Rubrobacter</i>                  |
| NY                                  | seq000087 | <i>Sinobacteraceae</i>              |
| NY                                  | seq000259 | <i>Candidatus Nitrososphaera</i>    |
| NY                                  | seq000132 | <i>Thermomonas</i>                  |
| NY                                  | seq000209 | <i>Nitrososphaera gargensis</i>     |
| NY                                  | seq000176 | <i>Ellin6075</i>                    |
| NY                                  | seq000261 | <i>Rubrobacteraceae</i>             |
| NY                                  | seq000402 | <i>Gaiellaceae</i>                  |
| NY                                  | seq000119 | <i>Steroidobacter</i>               |
| NY                                  | seq000093 | <i>Ellin6529</i>                    |
| NY                                  | seq000149 | <i>Bacillus selenatarsenatis</i>    |
| NY                                  | seq000198 | <i>Balneimonas</i>                  |
| NY                                  | seq000292 | <i>Rubrobacter</i>                  |
| NY                                  | seq000104 | <i>Streptomyces reticuliscabiei</i> |

| Compost related core features in G and NY |           |                        |
|-------------------------------------------|-----------|------------------------|
| NY and G                                  | seq000087 | <i>Sinobacteraceae</i> |
| NY and G                                  | seq000119 | <i>Steroidobacter</i>  |

| Conventional related core features in G and NY |           |                         |
|------------------------------------------------|-----------|-------------------------|
| NY and G                                       | seq000159 | <i>Geodermatophilus</i> |
| NY and G                                       | seq000184 | WD2101                  |
| NY and G                                       | seq000414 | iii1-15                 |
| NY and G                                       | seq000286 | iii1-15                 |
| NY and G                                       | seq000171 | <i>Rhizobiales</i>      |
| NY and G                                       | seq000327 | <i>Modestobacter</i>    |
| NY and G                                       | seq000406 | <i>Nitrospiraceae</i>   |
| NY and G                                       | seq002035 | <i>Skermanella</i>      |
| NY and G                                       | seq000288 | <i>Planococcaceae</i>   |
| NY and G                                       | seq000194 | <i>Comamonadaceae</i>   |
| NY and G                                       | seq000202 | Gemm-1                  |
| NY and G                                       | seq000285 | <i>Bacillales</i>       |

**Table S8A -Significant OTUs identified by MaAsLin2 and ANCOM G**

| <b>Ancom G</b> | <b>MaAsLin2 G</b> | <b>Common elements G</b> |
|----------------|-------------------|--------------------------|
| seq003612      | seq000017         | seq000017                |
| seq000408      | seq000017         | seq000071                |
| seq000922      | seq000071         | seq000158                |
| seq000251      | seq000071         | seq000295                |
| seq002331      | seq000158         | seq000033                |
| seq004317      | seq000295         | seq000251                |
| seq000633      | seq000033         | seq000394                |
| seq000415      | seq000251         | seq000236                |
| seq000076      | seq000394         | seq000238                |
| seq000706      | seq000071         | seq000318                |
| seq001103      | seq000158         | seq000134                |
| seq000158      | seq000037         | seq000076                |
| seq000071      | seq000236         | seq000345                |
| seq001021      | seq000251         | seq000368                |
| seq002816      | seq000017         | seq000922                |
| seq000345      | seq000295         | seq001041                |
| seq000238      | seq000238         | seq000524                |
| seq001760      | seq000318         | seq000633                |
| seq000295      | seq000134         | seq001535                |
| seq000394      | seq000076         | seq001384                |
| seq000937      | seq000345         | seq001149                |
| seq002397      | seq000368         | seq000799                |
| seq000236      | seq000236         | seq000116                |
| seq002762      | seq000174         | seq001108                |
| seq002501      | seq000922         | seq000415                |
| seq000805      | seq000318         | seq001514                |
| seq001108      | seq001041         | seq001342                |
| seq000581      | seq000238         | seq000656                |
| seq002079      | seq000158         | seq001796                |
| seq002142      | seq000027         | seq001231                |
| seq000318      | seq000394         | seq001690                |
| seq000813      | seq000524         | seq000336                |
| seq000341      | seq000633         | seq001021                |
| seq000829      | seq000168         | seq000419                |
| seq001690      | seq000174         | seq000517                |
| seq003424      | seq001535         | seq000452                |
| seq001796      | seq000033         | seq000351                |
| seq000587      | seq001384         | seq000122                |
| seq001342      | seq001149         | seq000587                |
| seq000830      | seq000305         | seq000813                |
| seq000799      | seq000799         | seq001444                |
| seq000017      | seq000171         | seq001205                |
| seq000452      | seq000499         | seq001456                |
| seq001249      | seq000116         | seq001507                |
| seq000464      | seq001108         | seq000495                |
| seq001192      | seq000169         | seq000672                |
| seq004424      | seq000415         | seq000439                |
| seq001162      | seq000193         | seq000464                |
| seq000711      | seq001514         | seq001054                |
| seq000726      | seq001377         | seq000722                |
| seq001149      | seq000037         | seq000146                |
| seq001939      | seq001342         | seq001405                |
| seq009299      | seq000656         | seq000937                |
| seq001507      | seq000013         | seq001910                |
| seq000768      | seq000137         | seq001353                |
| seq003444      | seq000236         | seq000726                |
| seq000134      | seq001796         | seq002501                |
| seq004188      | seq000009         | seq001743                |
| seq001041      | seq001231         | seq001558                |
| seq001570      | seq001690         | seq001975                |

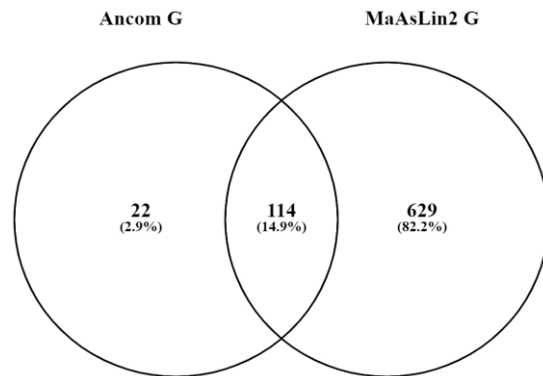

|           |           |           |
|-----------|-----------|-----------|
| seq000943 | seq001342 | seq000634 |
| seq000789 | seq000336 | seq000861 |
| seq007362 | seq000104 | seq001570 |
| seq000116 | seq000076 | seq000711 |
| seq000673 | seq001535 | seq000619 |
| seq002080 | seq001342 | seq001408 |
| seq001929 | seq000368 | seq002761 |
| seq002761 | seq000269 | seq003299 |
| seq000634 | seq000169 | seq000712 |
| seq001975 | seq001384 | seq001760 |
| seq000524 | seq000541 | seq001524 |
| seq001353 | seq001535 | seq001425 |
| seq000336 | seq000208 | seq002248 |
| seq002248 | seq000116 | seq002762 |
| seq001054 | seq001021 | seq002331 |
| seq001276 | seq000419 | seq000737 |
| seq002829 | seq000600 | seq000673 |
| seq001205 | seq001435 | seq001385 |
| seq001742 | seq000517 | seq000754 |
| seq001535 | seq000462 | seq002210 |
| seq001062 | seq000452 | seq000504 |
| seq000313 | seq000043 | seq001011 |
| seq000882 | seq000264 | seq001103 |
| seq004641 | seq000594 | seq001162 |
| seq000737 | seq000351 | seq002080 |
| seq001444 | seq000020 | seq000313 |
| seq002111 | seq000122 | seq001532 |
| seq000419 | seq000192 | seq001742 |
| seq000033 | seq000587 | seq001660 |
| seq000722 | seq000988 | seq000805 |
| seq000368 | seq000813 | seq001062 |
| seq001743 | seq001377 | seq002079 |
| seq002612 | seq001391 | seq000943 |
| seq002197 | seq000597 | seq001939 |
| seq001524 | seq000081 | seq002111 |
| seq001660 | seq000073 | seq000581 |
| seq000504 | seq000062 | seq003495 |
| seq001910 | seq000295 | seq000830 |
| seq001384 | seq000027 | seq000706 |
| seq002147 | seq000415 | seq001192 |
| seq000517 | seq000122 | seq003169 |
| seq001425 | seq000584 | seq001276 |
| seq001011 | seq000076 | seq000882 |
| seq000619 | seq000302 | seq000768 |
| seq000351 | seq001444 | seq004641 |
| seq004250 | seq000104 | seq002816 |
| seq000754 | seq000016 | seq001249 |
| seq001405 | seq000368 | seq003444 |
| seq002116 | seq001205 | seq002158 |
| seq001456 | seq000188 | seq000408 |
| seq005116 | seq001456 | seq003302 |
| seq000495 | seq000066 | seq003044 |
| seq003044 | seq000664 | seq004250 |
| seq000712 | seq000318 | seq002829 |
| seq000146 | seq000269 |           |
| seq000122 | seq001507 |           |
| seq000672 | seq000495 |           |
| seq001385 | seq000013 |           |
| seq002210 | seq000672 |           |
| seq001231 | seq000863 |           |
| seq002158 | seq000326 |           |
| seq000439 | seq001560 |           |

seq001514  
seq003495  
seq001558  
seq002822  
seq000656  
seq003299  
seq000861  
seq002150  
seq001409  
seq003302  
seq003169  
seq000782  
seq001532  
seq001408

seq002899  
seq000439  
seq000345  
seq000143  
seq001698  
seq000977  
seq000210  
seq000653  
seq000704  
seq001041  
seq000188  
seq000464  
seq001054  
seq000115  
seq000004  
seq000653  
seq000506  
seq000722  
seq000146  
seq000231  
seq000043  
seq000009  
seq001405  
seq000251  
seq000208  
seq000509  
seq000625  
seq000043  
seq001514  
seq000146  
seq000484  
seq000517  
seq000033  
seq000937  
seq001910  
seq001177  
seq000270  
seq000508  
seq000776  
seq000464  
seq001397  
seq000672  
seq001353  
seq004704  
seq000816  
seq000238  
seq000336  
seq000726  
seq000087  
seq000305  
seq000299  
seq002501  
seq000351  
seq000122  
seq000707  
seq000210  
seq000292  
seq000767  
seq000169  
seq001743  
seq001259  
seq000499

seq000116  
seq000138  
seq001558  
seq000269  
seq000078  
seq001975  
seq001405  
seq002899  
seq000813  
seq000611  
seq000634  
seq002665  
seq000861  
seq000134  
seq001059  
seq000524  
seq000020  
seq000877  
seq004704  
seq000393  
seq001570  
seq000430  
seq004470  
seq003597  
seq000650  
seq000711  
seq000729  
seq002800  
seq000619  
seq002743  
seq000464  
seq001408  
seq000105  
seq000462  
seq001607  
seq002761  
seq002483  
seq001153  
seq000307  
seq003299  
seq001397  
seq000676  
seq000712  
seq000451  
seq001760  
seq000722  
seq000462  
seq000014  
seq000034  
seq001248  
seq002264  
seq000270  
seq000439  
seq003431  
seq000712  
seq000166  
seq000452  
seq002554  
seq000260  
seq000013  
seq000393  
seq000003



seq001041  
seq001524  
seq003500  
seq002761  
seq002818  
seq002280  
seq004470  
seq001677  
seq001425  
seq000595  
seq000045  
seq002576  
seq000168  
seq003113  
seq000495  
seq000611  
seq000443  
seq001042  
seq004704  
seq000421  
seq000194  
seq000491  
seq000840  
seq002787  
seq001102  
seq000541  
seq000166  
seq001925  
seq001196  
seq000451  
seq000925  
seq000909  
seq000383  
seq001796  
seq001029  
seq000780  
seq001054  
seq000925  
seq000854  
seq000665  
seq002248  
seq000001  
seq001183  
seq002762  
seq000463  
seq000834  
seq000669  
seq000364  
seq000503  
seq000671  
seq000555  
seq001261  
seq001456  
seq002331  
seq000357  
seq000099  
seq000081  
seq001992  
seq000737  
seq000673  
seq002501  
seq000676

seq001219  
seq000414  
seq000015  
seq002056  
seq000222  
seq000171  
seq001290  
seq000587  
seq001178  
seq000545  
seq000570  
seq001054  
seq000037  
seq000081  
seq001352  
seq001385  
seq000728  
seq000103  
seq000020  
seq000039  
seq001258  
seq001925  
seq000629  
seq000671  
seq000022  
seq002765  
seq000892  
seq000354  
seq003113  
seq001029  
seq000861  
seq000503  
seq000048  
seq003023  
seq000096  
seq000754  
seq003066  
seq002840  
seq001439  
seq000649  
seq001672  
seq000443  
seq000132  
seq000138  
seq001248  
seq002264  
seq001377  
seq000600  
seq000517  
seq000854  
seq001370  
seq000722  
seq002376  
seq000206  
seq003596  
seq002210  
seq003299  
seq000104  
seq000066  
seq000617  
seq000191  
seq000767

seq000863  
seq000504  
seq000976  
seq001017  
seq001011  
seq001066  
seq000188  
seq001042  
seq000988  
seq000833  
seq000411  
seq001461  
seq000055  
seq004387  
seq000030  
seq004166  
seq001626  
seq000834  
seq003500  
seq002743  
seq000088  
seq000297  
seq001103  
seq000055  
seq002544  
seq003066  
seq000967  
seq000034  
seq000394  
seq004799  
seq000799  
seq000378  
seq001162  
seq000378  
seq001251  
seq000452  
seq001130  
seq000345  
seq002800  
seq000603  
seq000726  
seq003510  
seq000351  
seq004799  
seq000247  
seq000619  
seq000030  
seq002425  
seq001162  
seq002080  
seq001435  
seq000582  
seq001199  
seq001521  
seq000117  
seq000519  
seq003184  
seq000405  
seq000162  
seq000035  
seq000221  
seq000174

seq000594  
seq001677  
seq000958  
seq000070  
seq001391  
seq000313  
seq000319  
seq001532  
seq001017  
seq000054  
seq000586  
seq000633  
seq004599  
seq000930  
seq001132  
seq000184  
seq000573  
seq000434  
seq005446  
seq000087  
seq001688  
seq001698  
seq003021  
seq000877  
seq000023  
seq001069  
seq000977  
seq000291  
seq000324  
seq000649  
seq008853  
seq003113  
seq000041  
seq003681  
seq004470  
seq000909  
seq001384  
seq002259  
seq001742  
seq002507  
seq003184  
seq000026  
seq002650  
seq002530  
seq000656  
seq001190  
seq008267  
seq000027  
seq000597  
seq002343  
seq000107  
seq001660  
seq002122  
seq002430  
seq004657  
seq000137  
seq001558  
seq002840  
seq000383  
seq000506  
seq000692  
seq000307

seq000309  
seq003023  
seq000976  
seq006079  
seq000326  
seq000805  
seq000073  
seq000400  
seq001062  
seq001519  
seq002141  
seq001102  
seq000373  
seq000111  
seq000650  
seq001487  
seq003296  
seq001149  
seq000383  
seq000607  
seq000150  
seq002079  
seq004599  
seq000442  
seq000519  
seq003352  
seq002641  
seq000470  
seq000498  
seq001208  
seq000634  
seq000653  
seq004198  
seq000299  
seq002373  
seq000298  
seq001182  
seq000042  
seq003296  
seq000603  
seq000582  
seq000159  
seq005661  
seq008180  
seq000032  
seq001352  
seq000936  
seq001237  
seq000250  
seq000537  
seq003176  
seq001636  
seq000634  
seq001093  
seq000754  
seq002617  
seq000943  
seq000816  
seq000908  
seq000087  
seq001218  
seq003093

seq001847  
seq004392  
seq001939  
seq002507  
seq001391  
seq000716  
seq002761  
seq002091  
seq003066  
seq003520  
seq000921  
seq004944  
seq000055  
seq002111  
seq002422  
seq000344  
seq001145  
seq000874  
seq000443  
seq000792  
seq001218  
seq000581  
seq001863  
seq003500  
seq002840  
seq000554  
seq001448  
seq000966  
seq003652  
seq000247  
seq001522  
seq000406  
seq001452  
seq000555  
seq000124  
seq000208  
seq000545  
seq003901  
seq002273  
seq003184  
seq000115  
seq000790  
seq013669  
seq000875  
seq002576  
seq001178  
seq000309  
seq000570  
seq003495  
seq000887  
seq004791  
seq000664  
seq005446  
seq004420  
seq000830  
seq002554  
seq003510  
seq001062  
seq001403  
seq000014  
seq002259  
seq000978

seq000297  
seq002162  
seq004167  
seq001435  
seq000753  
seq002415  
seq001796  
seq002045  
seq000511  
seq001591  
seq001707  
seq001847  
seq001380  
seq003067  
seq005592  
seq008537  
seq000191  
seq000615  
seq000575  
seq006304  
seq000840  
seq004392  
seq000592  
seq002882  
seq000706  
seq017366  
seq003510  
seq000344  
seq000463  
seq000884  
seq000148  
seq002784  
seq001597  
seq000022  
seq000640  
seq002201  
seq001704  
seq000976  
seq004889  
seq002249  
seq000221  
seq001108  
seq000196  
seq000231  
seq002395  
seq000615  
seq000573  
seq003611  
seq001323  
seq005557  
seq001192  
seq003431  
seq001456  
seq003169  
seq001132  
seq012358  
seq004889  
seq000176  
seq000593  
seq001617  
seq002818  
seq003196

seq002376  
seq000172  
seq003176  
seq001674  
seq004818  
seq001276  
seq008853  
seq002821  
seq000077  
seq002201  
seq001901  
seq008853  
seq009561  
seq000736  
seq002715  
seq002288  
seq000422  
seq002149  
seq001171  
seq000738  
seq000792  
seq003021  
seq001660  
seq004898  
seq003596  
seq001452  
seq001248  
seq000592  
seq001720  
seq001412  
seq000882  
seq003196  
seq004888  
seq003520  
seq005133  
seq002595  
seq000243  
seq001464  
seq001262  
seq005592  
seq000162  
seq000089  
seq001145  
seq001224  
seq001117  
seq002576  
seq001739  
seq001059  
seq000326  
seq002363  
seq002911  
seq005131  
seq000696  
seq002881  
seq002313  
seq000422  
seq001130  
seq002091  
seq000307  
seq000661  
seq000957  
seq000146



seq000409  
seq004387  
seq000311  
seq003979  
seq000594  
seq000470  
seq000293  
seq012487  
seq000934  
seq004392  
seq001950  
seq002280  
seq003342  
seq001446  
seq002308  
seq000592  
seq001731  
seq001856  
seq000143  
seq004541  
seq004166  
seq000302  
seq002483  
seq006930  
seq004982  
seq004599  
seq002267  
seq000325  
seq002428  
seq000690  
seq000421  
seq000364  
seq000834  
seq003162  
seq000419  
seq001066  
seq000768  
seq000108  
seq001094  
seq001322  
seq001521  
seq002764  
seq002080  
seq001038  
seq000283  
seq003848  
seq001073  
seq004641  
seq019702  
seq000876  
seq005273  
seq002816  
seq002879  
seq001689  
seq000301  
seq000463  
seq001560  
seq000190  
seq000030  
seq003258  
seq001978  
seq000889

seq005169  
seq001147  
seq003196  
seq000921  
seq000336  
seq002390  
seq002260  
seq003299  
seq003296  
seq001127  
seq003322  
seq000287  
seq002577  
seq003597  
seq000545  
seq000089  
seq003911  
seq010124  
seq000403  
seq002744  
seq001561  
seq000795  
seq000600  
seq000134  
seq000373  
seq000622  
seq004296  
seq001431  
seq000729  
seq000436  
seq000707  
seq000604  
seq001405  
seq002363  
seq012338  
seq000016  
seq000541  
seq004538  
seq000051  
seq001196  
seq002363  
seq001522  
seq000008  
seq000595  
seq005375  
seq002743  
seq001182  
seq000642  
seq002879  
seq000085  
seq004328  
seq000137  
seq001352  
seq000078  
seq000794  
seq000780  
seq002313  
seq000291  
seq000458  
seq003611  
seq004799  
seq006342

seq000603  
seq000506  
seq000108  
seq003595  
seq000625  
seq005446  
seq000912  
seq000129  
seq004770  
seq000105  
seq000205  
seq005592  
seq003187  
seq000650  
seq001905  
seq000142  
seq000302  
seq001037  
seq003651  
seq003559  
seq006320  
seq000912  
seq000163  
seq006780  
seq003503  
seq001925  
seq000339  
seq000515  
seq000131  
seq001014  
seq002361  
seq000198  
seq003690  
seq001042  
seq001722  
seq001347  
seq012358  
seq001219  
seq002153  
seq002507  
seq000755  
seq003632  
seq002090  
seq000409  
seq001249  
seq012161  
seq002749  
seq001507  
seq000509  
seq002870  
seq001349  
seq002764  
seq004489  
seq007357  
seq000677  
seq001572  
seq019823  
seq000316  
seq002139  
seq004192  
seq002114  
seq000584

seq002764  
seq005103  
seq010357  
seq001145  
seq002153  
seq003355  
seq000453  
seq001117  
seq001120  
seq001183  
seq000097  
seq000925  
seq002689  
seq003192  
seq003550  
seq001993  
seq000909  
seq010289  
seq000282  
seq001196  
seq001081  
seq004051  
seq004051  
seq000854  
seq002060  
seq003399  
seq001446  
seq000210  
seq014631  
seq001231  
seq000002  
seq000439  
seq000293  
seq001770  
seq003979  
seq000984  
seq015259  
seq002645  
seq005993  
seq000365  
seq000876  
seq000378  
seq003051  
seq000039  
seq003444  
seq007705  
seq001849  
seq000406  
seq000772  
seq002264  
seq005698  
seq001259  
seq009558  
seq003067  
seq000386  
seq005408  
seq000214  
seq005531  
seq000710  
seq000101  
seq001380  
seq002395

seq003632  
seq001228  
seq002899  
seq001827  
seq002903  
seq011063  
seq004844  
seq000567  
seq001150  
seq002618  
seq004245  
seq000111  
seq000950  
seq000015  
seq002122  
seq000072  
seq000107  
seq000595  
seq005561  
seq005133  
seq000565  
seq003246  
seq001510  
seq000293  
seq000132  
seq001387  
seq001073  
seq002832  
seq004119  
seq000093  
seq003310  
seq002267  
seq001937  
seq000247  
seq000553  
seq000642  
seq001847  
seq000560  
seq000568  
seq000323  
seq000099  
seq004944  
seq003520  
seq003604  
seq000877  
seq000876  
seq006628  
seq002323  
seq004387  
seq001453  
seq001693  
seq001066  
seq000077  
seq000194  
seq000933  
seq002940  
seq017095  
seq005698  
seq002290  
seq017046  
seq002362  
seq012358

seq000710  
seq002461  
seq002617  
seq001439  
seq000555  
seq002158  
seq000160  
seq003985  
seq000220  
seq002098  
seq011000  
seq003023  
seq002403  
seq005560  
seq002617  
seq002737  
seq006199  
seq002838  
seq004818  
seq012570  
seq001730  
seq000408  
seq000078  
seq003302  
seq002390  
seq000542  
seq000938  
seq002272  
seq000476  
seq001675  
seq009812  
seq002689  
seq001510  
seq014354  
seq001823  
seq000811  
seq000191  
seq003071  
seq004892  
seq002800  
seq003616  
seq001452  
seq000319  
seq004462  
seq003044  
seq002821  
seq000612  
seq000575  
seq000721  
seq001764  
seq004250  
seq002056  
seq008014  
seq000697  
seq002829  
seq000103  
seq012161  
seq006609  
seq004328  
seq006304  
seq000059  
seq000615

seq002352  
seq000642  
seq000485  
seq001363  
seq000737  
seq003729  
seq004462  
seq009619  
seq000811  
seq005718  
seq006320  
seq003375  
seq000485  
seq027227  
seq006285  
seq006022  
seq000629  
seq004107  
seq003322  
seq001786  
seq003862  
seq000569  
seq005201  
seq001238  
seq003556  
seq001626  
seq000696  
seq000282  
seq002232  
seq002045  
seq000924  
seq002313  
seq003218  
seq005103  
seq001449  
seq001028  
seq006285  
seq007380  
seq000619  
seq018528  
seq000098  
seq001901  
seq002621  
seq000240  
seq003820  
seq001553  
seq000520  
seq000636  
seq000814  
seq002749  
seq001842  
seq000250  
seq001346  
seq001797  
seq010129  
seq002522  
seq000779  
seq007087  
seq000484

**Table S8 B -Significant OTUs identified by MaAsLin2 and ANCOM in NY**

| Ancom NY  | MaAsLin2 NY | Common elements NY |
|-----------|-------------|--------------------|
| seq000071 | seq000071   | seq000071          |
| seq000313 | seq000053   | seq000053          |
| seq000158 | seq000071   | seq000295          |
| seq000231 | seq000053   | seq000231          |
| seq000336 | seq000295   | seq000158          |
| seq000295 | seq000231   | seq000409          |
| seq000409 | seq000158   | seq000318          |
| seq000760 | seq000409   | seq000188          |
| seq000236 | seq000318   | seq000504          |
| seq000076 | seq000071   | seq000017          |
| seq000345 | seq000188   | seq000236          |
| seq001441 | seq000158   | seq000419          |
| seq000452 | seq000504   | seq000122          |
| seq000504 | seq000231   | seq000076          |
| seq000188 | seq000017   | seq000881          |
| seq000881 | seq000236   | seq000345          |
| seq000238 | seq000493   | seq000238          |
| seq000053 | seq000419   | seq000313          |
| seq000861 | seq000055   | seq001021          |
| seq000318 | seq001342   | seq000581          |
| seq000768 | seq000409   | seq000737          |
| seq000737 | seq000122   | seq000768          |
| seq000587 | seq000087   | seq000760          |
| seq001386 | seq000076   | seq000336          |
| seq001021 | seq000055   | seq000782          |
| seq000782 | seq000188   | seq000587          |
| seq000994 | seq000659   |                    |
| seq000017 | seq000881   |                    |
| seq000789 | seq000081   |                    |
| seq000122 | seq000017   |                    |
| seq001011 | seq000230   |                    |
| seq000581 | seq001423   |                    |
| seq001576 | seq000295   |                    |
| seq000706 | seq004744   |                    |
| seq001062 | seq000574   |                    |
| seq000419 | seq000318   |                    |
|           | seq000019   |                    |
|           | seq000345   |                    |
|           | seq000236   |                    |
|           | seq000770   |                    |
|           | seq000238   |                    |
|           | seq000574   |                    |
|           | seq000138   |                    |
|           | seq000041   |                    |
|           | seq000146   |                    |
|           | seq000320   |                    |
|           | seq000189   |                    |
|           | seq000345   |                    |
|           | seq000645   |                    |
|           | seq000081   |                    |
|           | seq000087   |                    |
|           | seq000055   |                    |
|           | seq000409   |                    |
|           | seq000726   |                    |
|           | seq000462   |                    |
|           | seq000389   |                    |
|           | seq000001   |                    |
|           | seq001766   |                    |
|           | seq000477   |                    |
|           | seq000813   |                    |
|           | seq000813   |                    |
|           | seq000750   |                    |
|           | seq000003   |                    |
|           | seq000122   |                    |
|           | seq000419   |                    |
|           | seq000711   |                    |
|           | seq000023   |                    |
|           | seq000053   |                    |

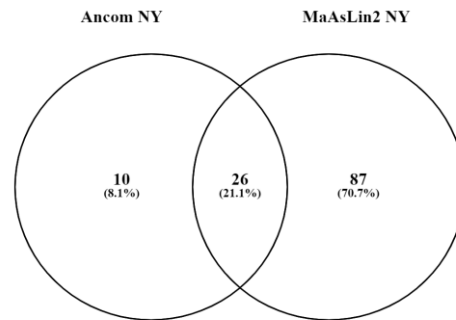



seq000313  
seq000081  
seq000077  
seq001021  
seq000019  
seq000581  
seq001342  
seq000750  
seq000504  
seq001224  
seq000737  
seq000647  
seq001342  
seq000768  
seq004744  
seq000666  
seq000760  
seq000760  
seq000016  
seq000299  
seq004847  
seq000105  
seq000073  
seq000297  
seq000297  
seq001766  
seq000029  
seq000295  
seq000336  
seq000099  
seq000782  
seq000666  
seq000702  
seq004744  
seq004847  
seq000043  
seq000732  
seq003902  
seq003881  
seq003151  
seq001639  
seq007678  
seq000228  
seq000230  
seq000384  
seq001099  
seq005959  
seq000541  
seq000428  
seq000228  
seq000402  
seq000032  
seq006932  
seq000505  
seq000058  
seq001293  
seq000310  
seq001974  
seq002181  
seq001190  
seq000395  
seq000072  
seq000152  
seq000212  
seq005926  
seq000107  
seq000311  
seq000224  
seq002005  
seq009683

seq005418  
seq000019  
seq000740  
seq000711  
seq000693  
seq008932  
seq000772  
seq000244  
seq000853  
seq003625  
seq001353  
seq000587  
seq000085  
seq000516  
seq000132
